# Supplementary material
Source: PubMed Central journal article supplement (PMC10752439)
Supplement: NIHMS1946427-supplement-1.pdf [file NIHMS1946427-supplement-1.pdf]

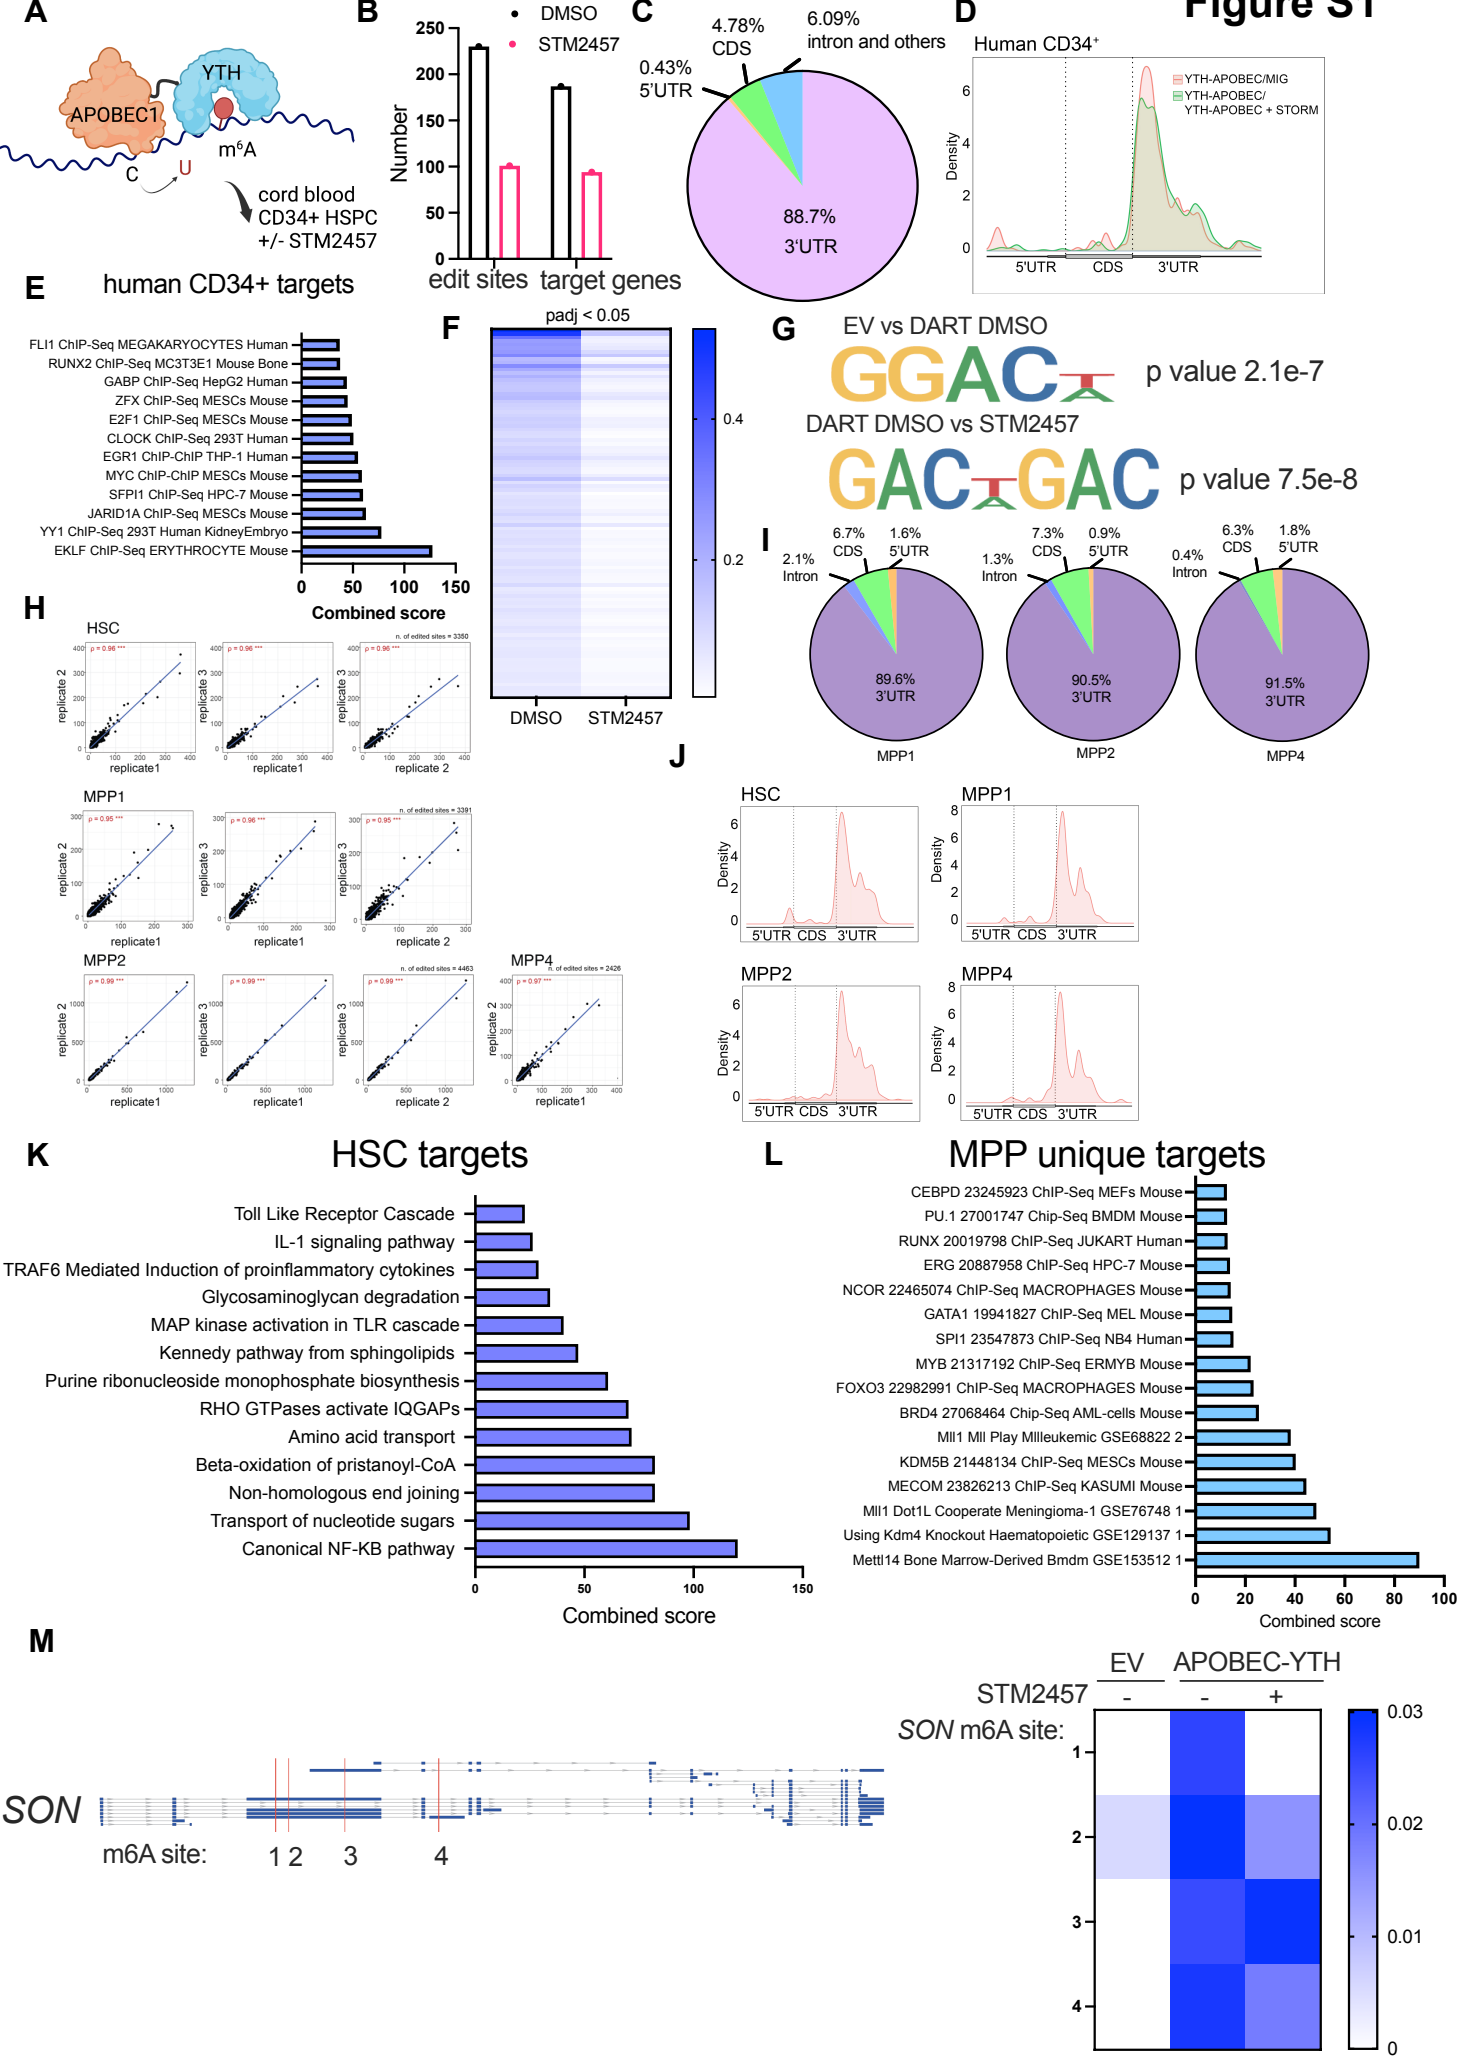

Supplementary Figure 1: DART-seq identifies SON as a conserved m<sup>6</sup>A target in mouse and human HSCs. Related to Figure 1.

- (A) Schematic illustration of the DART-seq experiment in purified human CD34<sup>+</sup> cells treated with or without the METTL3 inhibitor STM2457 (20 $\mu$ M for 2 days).
- (B) DART-seq identified significant editing sites and gene targets in purified human CD34<sup>+</sup> cells treated with or without the METTL3 inhibitor STM2457. n=3, three independent experiments. Edit sites and gene targets were compared between CD34<sup>+</sup> APOBEC-YTH DMSO vs empty vector; or CD34<sup>+</sup> APOBEC-YTH STM2457 vs empty vector samples. Sites with adjusted p.binomial<0.05 were defined as significant.
- (C) DART-seq gene targets in purified human CD34<sup>+</sup> cells were mainly localized to 3'UTR.
- (D) Metagene plot of DART-seq in human CD34<sup>+</sup> cells treated with or without the METTL3 inhibitor STM2457 target sites showed an enrichment of editing close to the stop codon.
- (E) Enrichr pathway analysis using the human CD34<sup>+</sup> cells DART-seq targets.
- (F) METTL3 inhibitor STM2457 treatment significantly reduced the editing frequency on the DART-seq targets in purified human CD34<sup>+</sup> cells. Sites were compared between CD34<sup>+</sup> APOBEC-YTH DMSO sample and CD34<sup>+</sup> APOBEC-YTH STM2457 sample. Sites with adjusted p.binomial<0.05 were defined as significant, n=3 independent experiments.
- (G) m<sup>6</sup>A DRACH motif is enriched in DART-seq sites. Sites with a log<sub>2</sub>Fold edit greater than 1.5 and adjusted P value < 0.05 were defined as significantly edited sites.
- (H) Reproducibility of the DART-seq data. Correlation of the total edited reads per site across the replicates containing the YTH-APOBEC construct (Pearson correlation in red, P value < 0.001 and indicated by \*\*\*).
- (I) DART-seq targets in mouse MPP populations were mainly localized to 3'UTR.
- (J) Metagene plot of DART-seq target sites in mouse HSC and MPPs showed an enrichment of editing close to the stop codon.
- (K) Enrichr pathway analysis using the mouse HSC DART-seq targets.
- (L) Enrichr pathway analysis using the mouse MPP DART-seq targets that are not shared with HSCs.
- (M) Three out of four m<sup>6</sup>A sites on the SON transcript are sensitive to STM2457 treatment. Location of m<sup>6</sup>A sites on the SON transcript in human CD34<sup>+</sup> cells were shown. Red vertical lines indicate the location of each m<sup>6</sup>A sites (Site 1,2,3,4). Heatmap of C to U editing frequency of each site in EV (empty vector) or APOBEC-YTH overexpressing CD34<sup>+</sup> cells treated with or without STM2457.

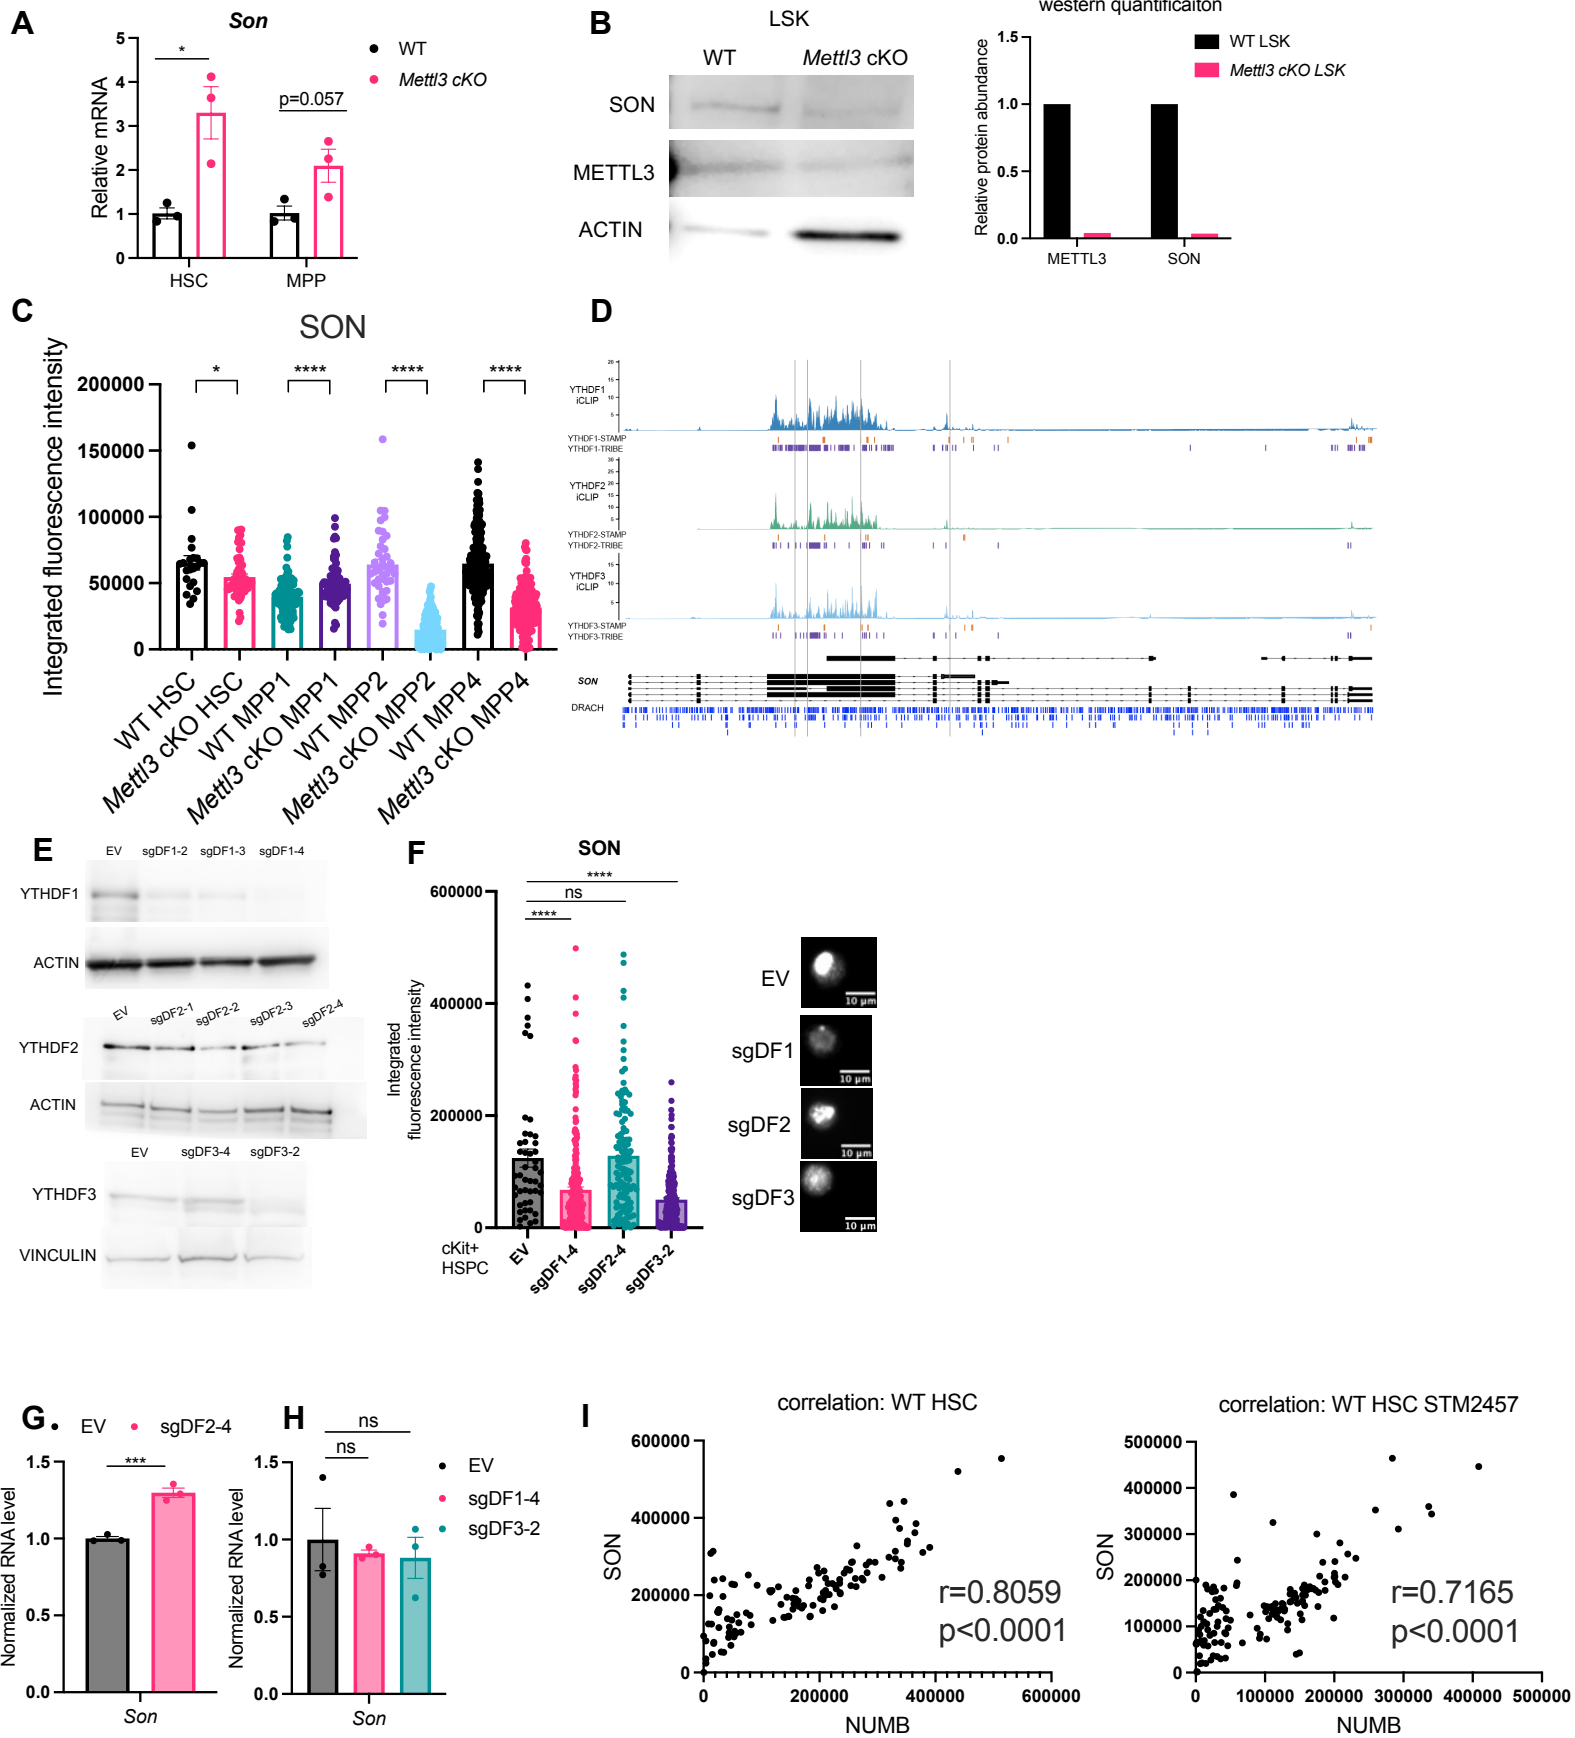

Supplementary Figure 2: Depletion of m<sup>6</sup>A reduces SON protein abundance. Related to Figure 2.

- (A) *Son* mRNA was increased in *Mettl3* cKO HSCs and MPPs. qPCR was performed in RNA isolated from purified WT and *Mettl3* cKO HSCs and MPPs. n=3 mice.
- (B) SON protein abundance was reduced in *Mettl3* cKO LSKs. WT and *Mettl3* cKO LSKs were sorted from a pool of 3 mice. SON protein abundance was measured by western blotting.
- (C) SON protein abundance was reduced in *Mettl3* cKO HSCs, MPP2s and MPP4s, except for MPP1s. Quantification of SON protein abundance by immunofluorescence in WT and *Mettl3* cKO HSCs and MPPs.
- (D) YTHDF1/2/3 binding patterns to the *SON* transcript using YTHDF1/2/3 iCLIP, STAMP (YTHDF1/2/3-APOBEC1) and TRIBE (YTHDF1/2/3-ADAR) datasets. These data demonstrate direct binding of the three RBPs in SON, with major signal around the exon 3. Importantly, these data also show that the SON m<sup>6</sup>A site regions detected by our DART-seq data in human CD34+ HSPCs (gray lines) are located at the identified YTHDF1/2/3 binding sites.
- (E) Depletion of YTHDF1, YTHDF2, or YTHDF3 protein in WT cKit<sup>+</sup> bone marrow cells using sgRNAs. *RosaCas9* WT cKit<sup>+</sup> bone marrow cells were transduced with 2-4 sgRNAs against mouse YTHDF1, YTHDF2, or YTHDF3, GFP<sup>+</sup> cells were sorted followed by western blotting. The sgRNAs with the best knockout (sgDF1-4, sgDF2-4, sgDF3-2) were selected. n=3 independent experiments.
- (F) Depletion of YTHDF1 or YTHDF3, but not YTHDF2, reduced SON protein abundance in WT cKit<sup>+</sup> bone marrow cells. *RosaCas9* WT cKit<sup>+</sup> HSPCs were transduced with sgRNA against YTHDF1-3 proteins respectively, GFP<sup>+</sup> cells were sorted followed by immunofluorescence. n=3 independent experiments. Left, quantification of SON abundance using immunofluorescence. Right, representative images of SON abundance in each condition.
- (G) Depletion of YTHDF2 increased *Son* mRNA expression in WT cKit<sup>+</sup> bone marrow cells. *RosaCas9* WT cKit<sup>+</sup> bone marrow cells were transduced with sgRNA against YTHDF2, GFP<sup>+</sup> cells were sorted followed by qPCR. n=2 independent experiments.
- (H) Depletion of YTHDF1 or YTHDF3 does not alter *Son* mRNA expression in WT cKit<sup>+</sup> bone marrow cells. *RosaCas9* WT cKit<sup>+</sup> bone marrow cells were transduced with sgRNA against YTHDF1 or YTHDF3, GFP<sup>+</sup> cells were sorted followed by qPCR. n=3 independent experiments.
- (I) SON protein abundance highly correlate with NUMB protein in the paired daughter cell assays. Data in (A), (C), (E), (F), (G) represent means  $\pm$  s.e.m. , \* represents  $p < 0.05$ . \*\* represents  $p < 0.01$ . \*\*\* represents  $p < 0.001$ . \*\*\*\* represents  $p < 0.0001$ . ns represents  $p > 0.05$ .

**Figure S3**

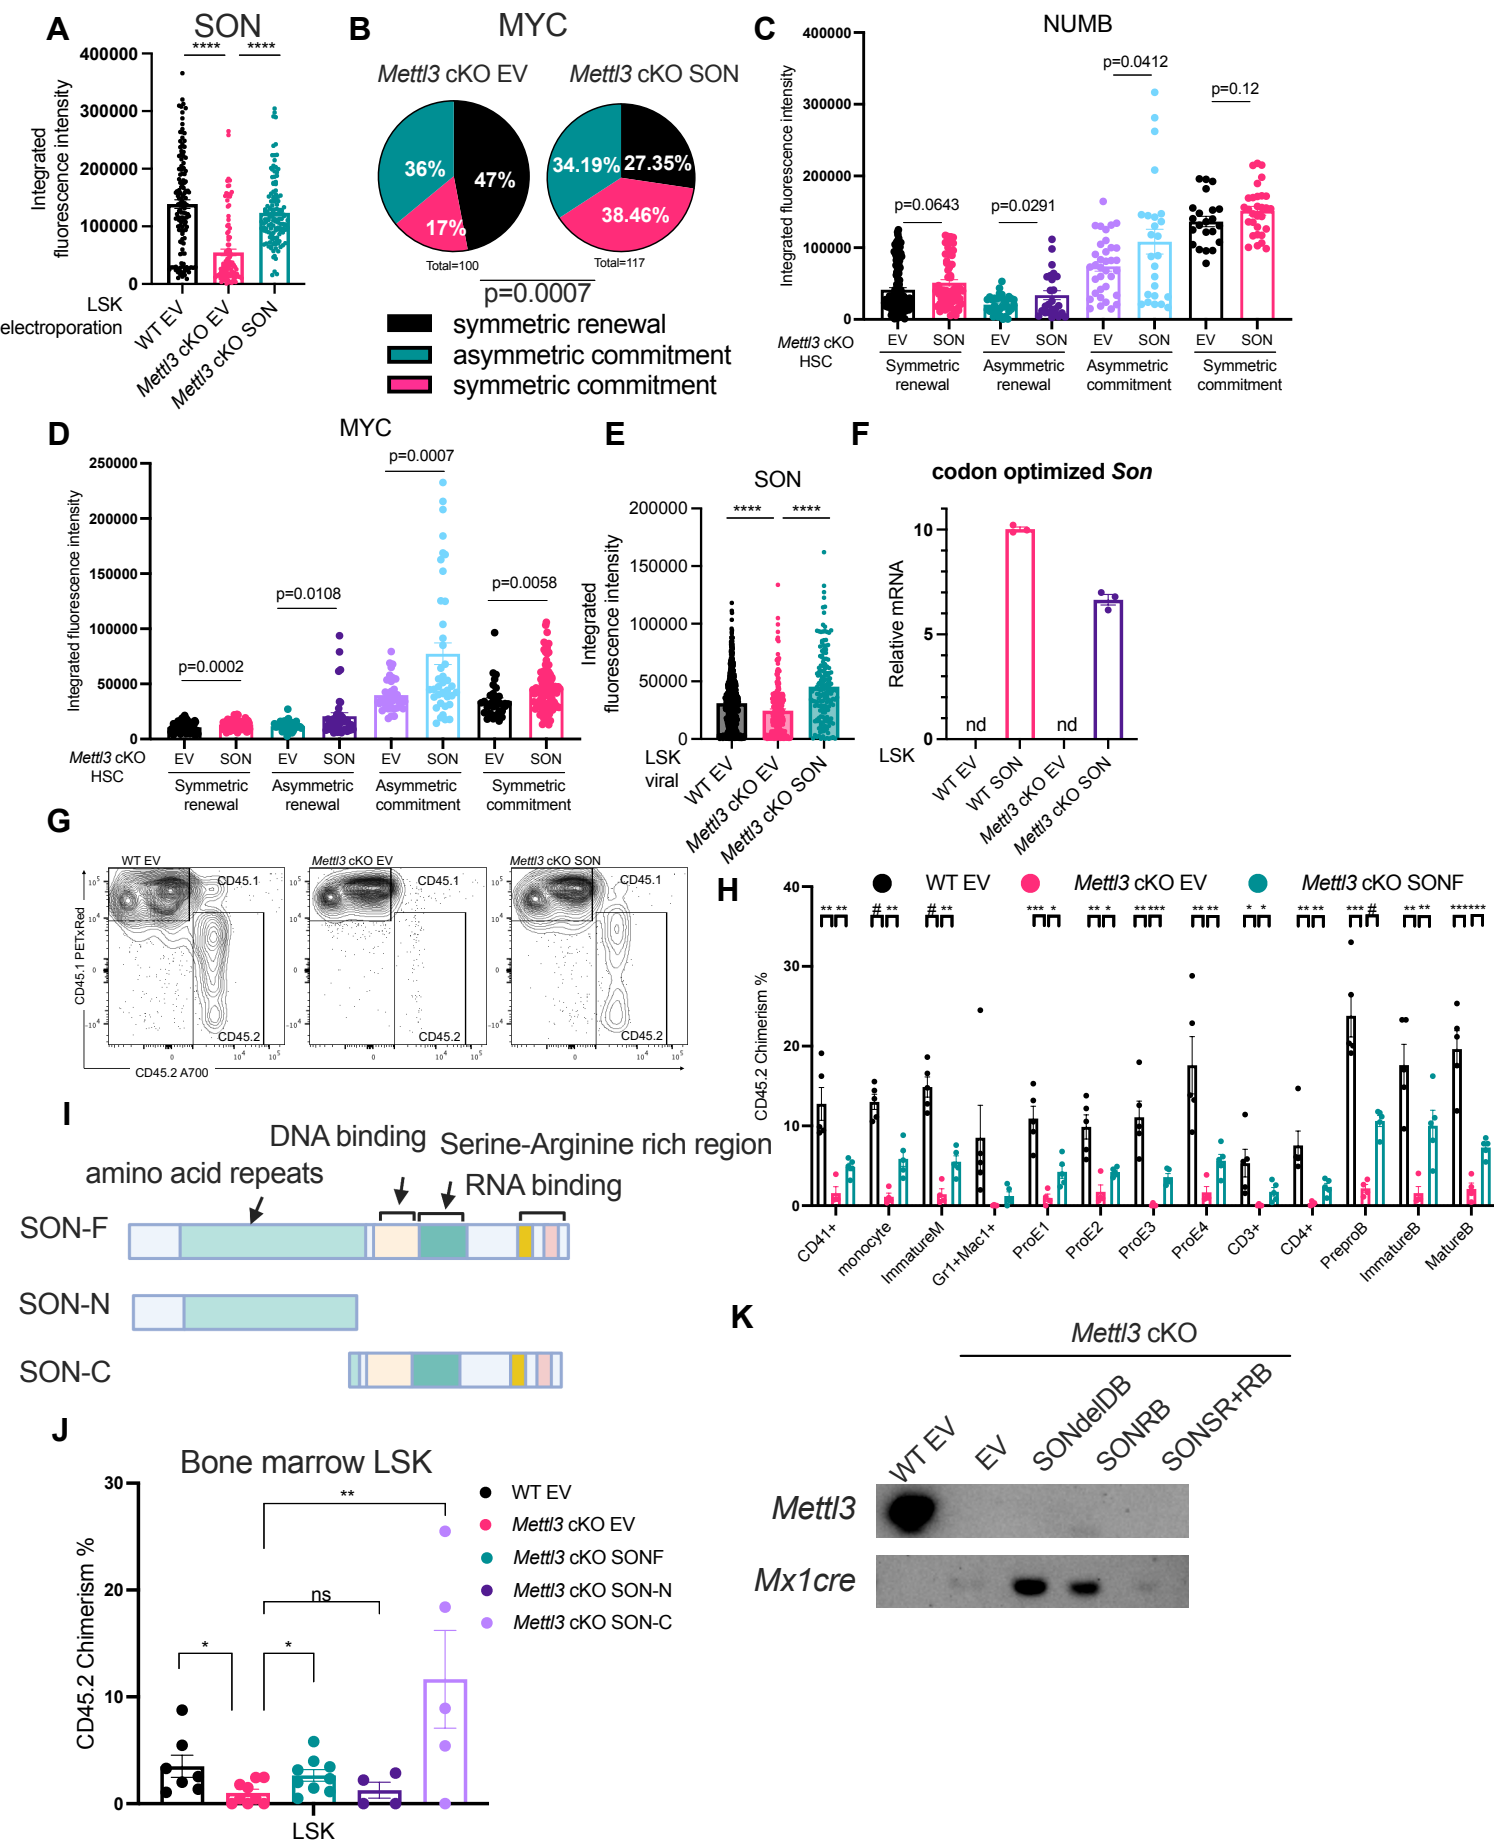

Supplementary Figure 3: SON rescues the symmetric commitment defect in m<sup>6</sup>A deficient HSCs. Related to Figure 3.

- (A) Increase of SON protein abundance in *Mettl3* cKO LSKs electroporated with SON overexpressing plasmid measured by immunofluorescence.
- (B) SON overexpression in *Mettl3* cKO HSC rescues its symmetric commitment defect measured by MYC symmetric high divisions. *Mettl3* cKO HSCs were sorted from a pool of at least 3 mice and electroporated with empty vector or SON overexpressing plasmid. Paired daughter cell assay was then performed using these cells. Percentages of doublet cells in each type of cell division were shown. n=100 (*Mettl3* cKO EV using MYC IF), n=117 (*Mettl3* cKO SON using MYC IF); P value was calculated using Chi-square test.
- (C) NUMB abundance was not increased in SON overexpressing cells that underwent a symmetric commitment fate. NUMB protein abundance was measured in each HSC divisions (symmetric renewal divisions (NUMB/MYC low), asymmetric divisions (including NUMB/MYC low and NUMB/MYC high), and symmetric commitment divisions (NUMB/MYC high)) using immunofluorescence.
- (D) MYC protein abundance was significantly increased in all HSC fate categories. MYC protein abundance was measured in each HSC divisions (symmetric renewal divisions (NUMB/MYC low), asymmetric divisions (including NUMB/MYC low and NUMB/MYC high), and symmetric commitment divisions (NUMB/MYC high)) using immunofluorescence.
- (E) Increase of SON protein abundance in *Mettl3* cKO LSKs transduced with SON overexpressing lentivirus measured by immunofluorescence.
- (F) Increase of codon optimized *Son* transcript in WT and *Mettl3* cKO LSKs transduced with SON overexpressing lentivirus measured by qPCR.
- (G) Representative flow cytometry plots showing donor engraftment gating in experiments performed in Figure 3E.
- (H) SON overexpression rescues the multilineage engraftment of *Mettl3* cKO LSKs. Quantification of the frequency of donor-derived cells in myeloid, erythroid, megakaryocytic, and lymphoid lineages were shown in the peripheral blood at 4-week post transplantation, n = 4-5. n represents number of mice.
- (I) Scheme of SON N-terminal and C-terminal truncation mutants. Human *SON* mRNA coding sequence was divided into half, N-terminal, and C-terminal parts.
- (J) C-terminal of SON, but not the N-terminal was able to rescue the functional defect of *Mettl3* cKO LSKs. Quantification of the frequency of donor-derived cells was shown in the bone marrow LSK population 9 weeks post transplantation. n=4-9, n represents number of mice.
- (K) Genotyping of engrafted donor cells confirms that *Mettl3* remains deleted. Engrafted donor cells were sorted, and their genomic DNA were extracted. Genotyping PCR using primers that detects the *Mettl3* exon 4 (the exon that should be excised due to cre activation) and the *Mx1 cre* locus were performed. Data in (A), (C), (D), (E), (F), (H), (J) represent means  $\pm$  s.e.m. , \* represents  $p < 0.05$ . \*\* represents  $p < 0.01$ . \*\*\* represents  $p < 0.001$ . # represents  $p < 0.0001$ . ns represents  $p > 0.05$ .

Figure S4

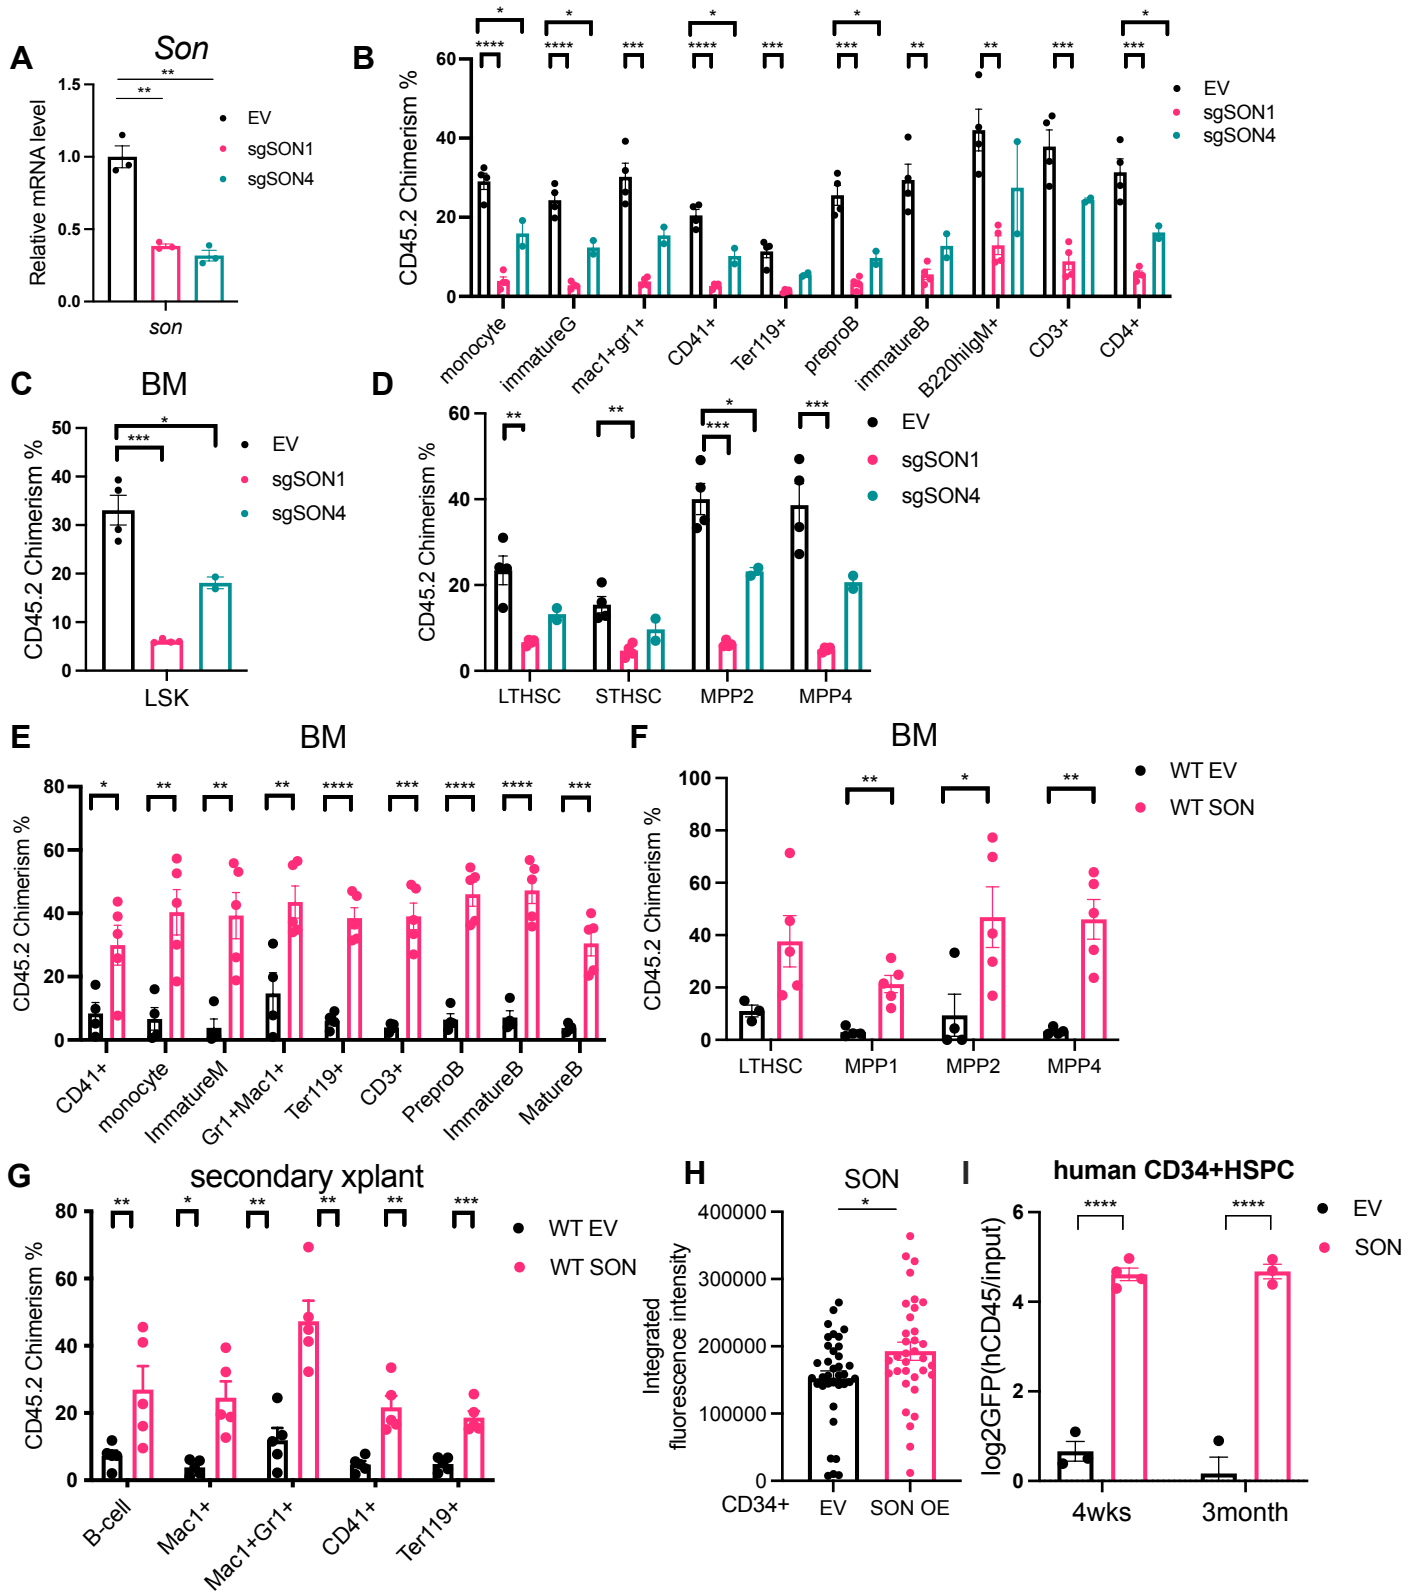

Supplemental Figure 4: SON is an important hematopoietic stem cell regulator. Related to Figure 4.

- (A) *Son* mRNA levels were reduced in the *RosaCas9* LSK cells transduced with sgRNAs against SON measured by qPCR.
- (B) Knockdown of SON reduced donor CD45.2 chimerism in the myeloid, erythroid, megakaryocytic, and lymphoid lineages population 5 months post transplantation with sgSON1 and sgSON4 groups. n=2-5, n represents number of mice. Representative of two independent experiments.
- (C) Knockdown of SON reduced donor CD45.2 chimerism in LSK population 5 months post transplantation with sgSON1 and sgSON4 groups. n=2-5, n represents number of mice. Representative of two independent experiments.
- (D) Knockdown of SON reduced donor CD45.2 chimerism in stem cell populations 5 months post transplantation with sgSON1 and sgSON4 groups. n=2-5, n represents number of mice. Representative of two independent experiments.
- (E) SON overexpression in WT LSKs resulted in increased multilineage engraftment in the peripheral blood 4 months post transplantation. n=4-5, n represents number of mice.
- (F) SON overexpression in WT LSKs resulted in increased stem cell engraftment 4 months post transplantation. n=4-5, n represents number of mice.
- (G) SON overexpression in WT LSKs resulted in increased stem cell engraftment 4 months post transplantation in secondary transplantation. n=5, n represents number of mice.
- (H) Increase of SON protein abundance in CD34+ cells transduced with SON overexpressing lentivirus measured by immunofluorescence.
- (I) SON overexpression increases in vivo repopulating capacity in human CD34+ cells. Figure S5I are results from an independent repeat of experiment in Figure 5H-I. Human CD34+ cells were purified from at least 6 mixed CB units (each unit from one healthy donor), transduced with empty vector or SON overexpressing lentivirus. Before transplantation, GFP frequency were measured in the input donor cells. 20k transduced human CD34+ cells were then transplanted into NSGS recipient mice and donor engraftment were measured at 4 weeks and 12 weeks post transplantation. GFP frequency in the hCD45 engrafted population were measured and the relative enrichment of GFP+ donor cells were plotted. n=3-4, n represents number of mice. Representative of three independent experiments. Data in (A-I) represent means  $\pm$  s.e.m. , \* represents  $p < 0.05$ . \*\* represents  $p < 0.01$ . \*\*\* represents  $p < 0.001$ . \*\*\*\* represents  $p < 0.0001$ . ns represents  $p > 0.05$ .



Figure S5

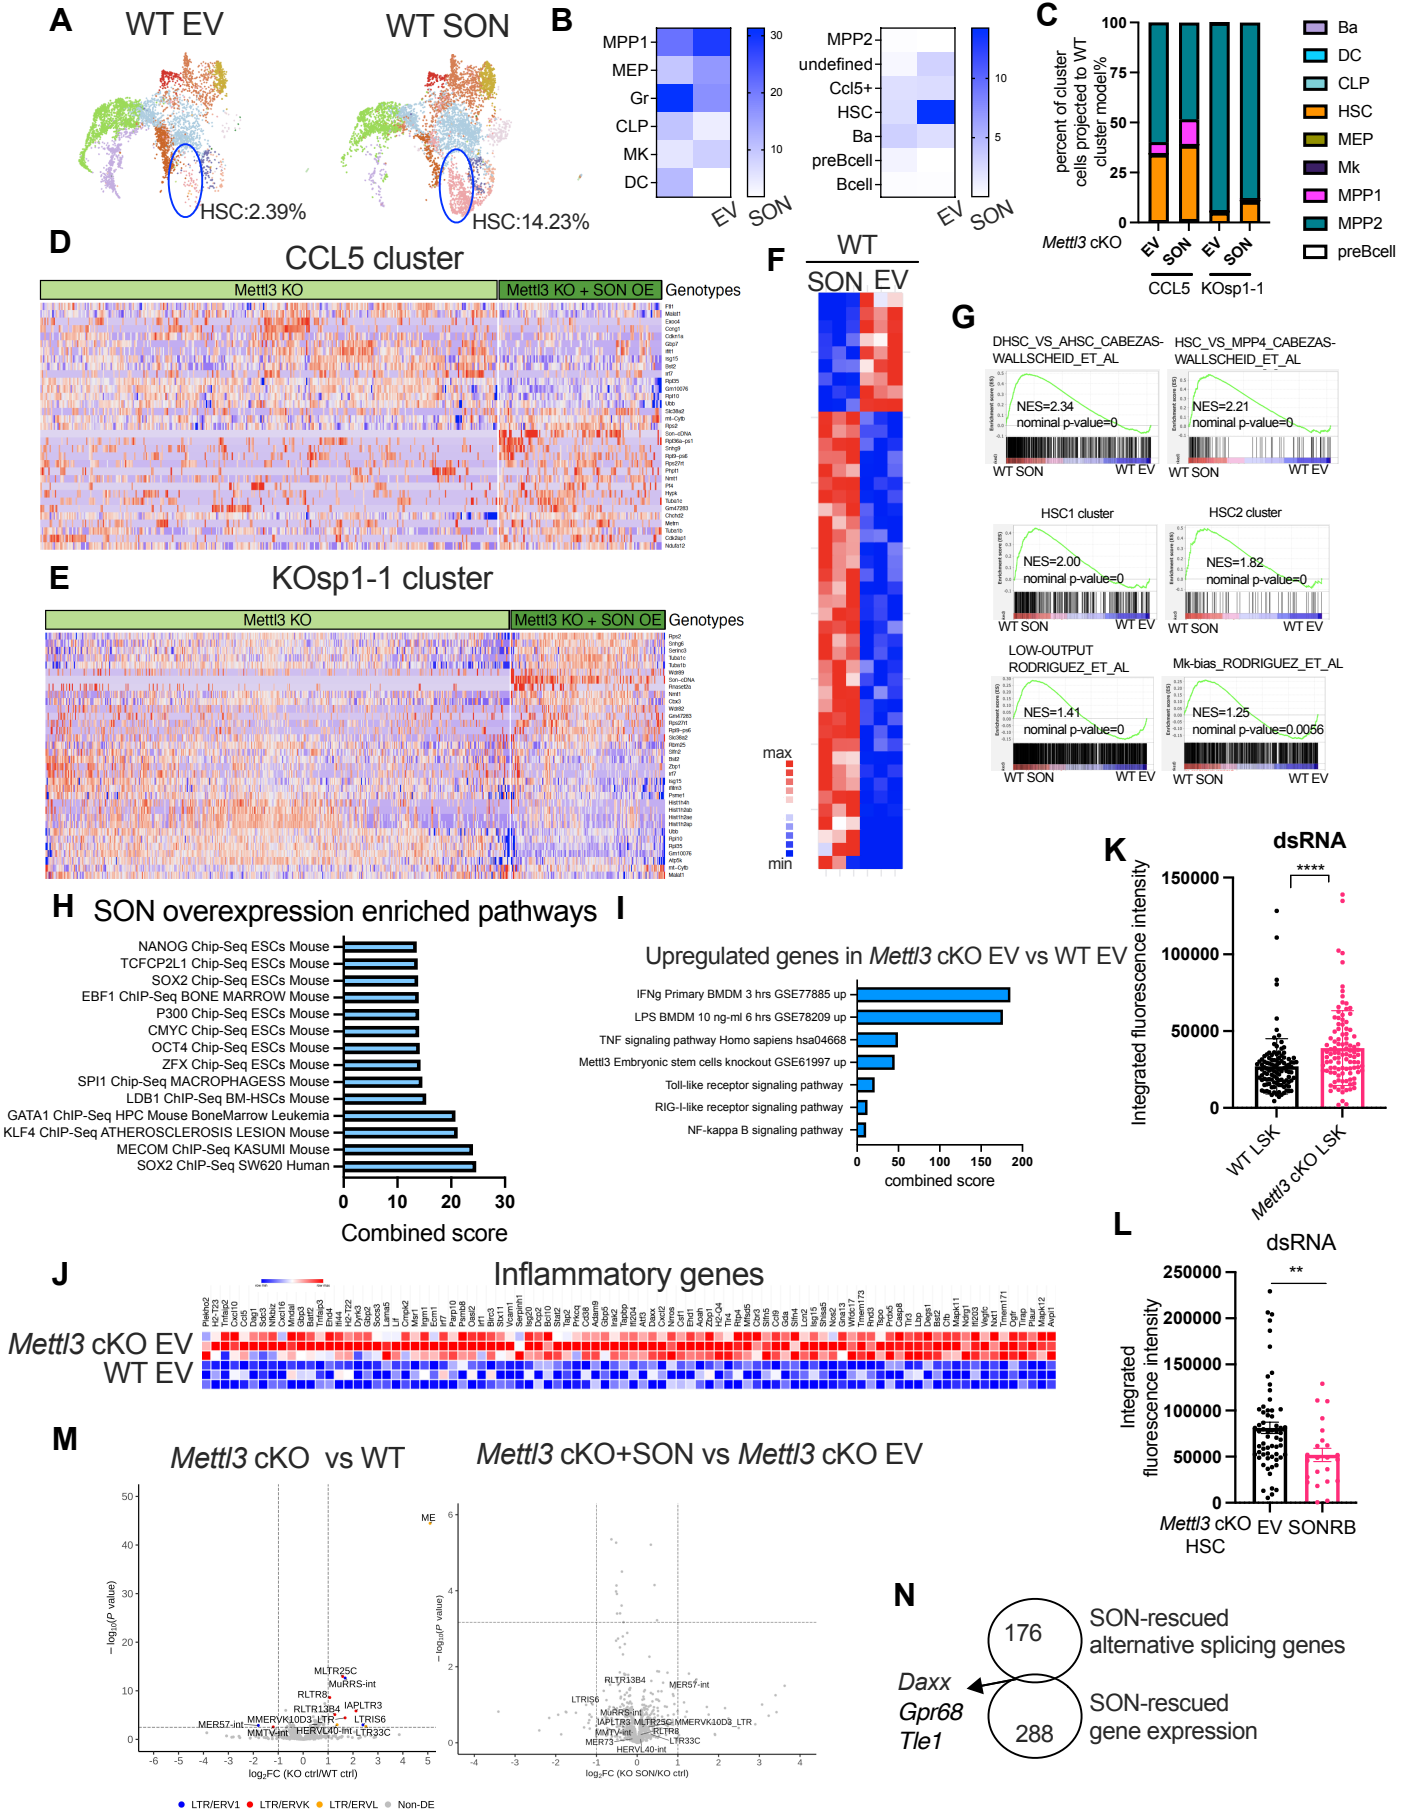

Supplementary Figure 5: SON partially rescues the inflammatory program in *Mettl3* cKO HSCs. Related to Figure 5.

- (A) UMAP of WT empty vector and WT SON overexpressing LSKs from single-cell RNA sequencing (scRNA-seq) showed an expansion of the HSC cluster.
- (B) Quantification of cell frequencies of different clusters in WT EV, WT SON LSK cells based on scRNA-seq.
- (C) Increased projection to WT HSC cluster with SON overexpression in both CCL5 and KOsp1-1 clusters. Maximum likelihood of the CCL5 and KOsp1-1 cluster in *Mettl3* cKO EV and *Mettl3* cKO SON overexpressing samples into the WT EV expression models was performed based on the transcriptome profile from scRNA-seq.
- (D) Differential gene expression analysis between *Mettl3* cKO EV and *Mettl3* cKO SON overexpressing CCL5 cluster. The default Wilcoxon-Rank sum test in FindMarkers was used to identify differential expressed genes present in at least 25% of the cells in either group (min.pct = 0.25). The final set of DEGs (differential expressed genes) was determined by filtering for a P value adjusted < 0.05.
- (E) Differential gene expression analysis between *Mettl3* cKO ctrl and *Mettl3* cKO SON overexpressing KOsp1-1 cluster. The default Wilcoxon-Rank sum test in FindMarkers was used to identify differential expressed genes present in at least 25% of the cells in either group (min.pct = 0.25). The final set of DEGs was determined by filtering for a P value adjusted < 0.05.
- (F) Heatmap showing the differential expressed genes between the WT EV and WT SON overexpressing LSK cells. (cut-off for the differential expressed genes: padj < 0.1)
- (G) GSEA analysis showing the pathways enriched in the WT SON overexpressing cells using the gene expression rank-list comparing WT EV vs WT SON in LSKs.
- (H) Enrichr pathway enrichment analysis of the genes that were upregulated expressed between WT ctrl and WT SON. (cut-off for the differential expressed genes: padj < 0.1)
- (I) Enrichr pathway enrichment analysis of the genes that were differentially expressed between WT EV and *Mettl3* cKO EV LSKs. (cut-off for the differentially expressed genes: padj < 0.05)
- (J) Heatmap showing the upregulation of inflammatory genes in *Mettl3* cKO EV LSKs compared to WT EV.
- (K) Increased dsRNA amount in *Mettl3* cKO LSKs. Quantification of dsRNA abundance by immunofluorescence in each group. n=2 independent experiments.
- (L) SON-RB reduces the dsRNA amount in *Mettl3* cKO LSKs. Quantification of dsRNA abundance by immunofluorescence in each group.
- (M) SON overexpression does not rescue the altered endogenous retrovirus expression in *Mettl3* cKO LSKs. Volcano plot showing log<sub>2</sub>-transformed fold change (log<sub>2</sub>FC) in retrotransposon expression in *Mettl3* cKO EV versus WT EV LSKs (left) and *Mettl3* cKO SON versus *Mettl3* cKO EV LSKs (right) using random assignment of multi-mapped reads. Blue, red, and orange denote significantly deregulated RepeatMasker annotations belonging to ERV1, ERVK, and ERVL, respectively. Grey denotes non-differentially expressed (non-DE) retrotransposons. P values were computed using DESeq2 and adjusted with the Benjamin–Hochberg Procedure (Methods).  $\text{abs}(\log_2\text{FC}) \geq 1$ ; false discovery rate (FDR)  $\leq 0.05$ .
- (N) Only three genes overlap between the SON-rescued alternative splicing gene targets and SON-rescued differential expressed genes.

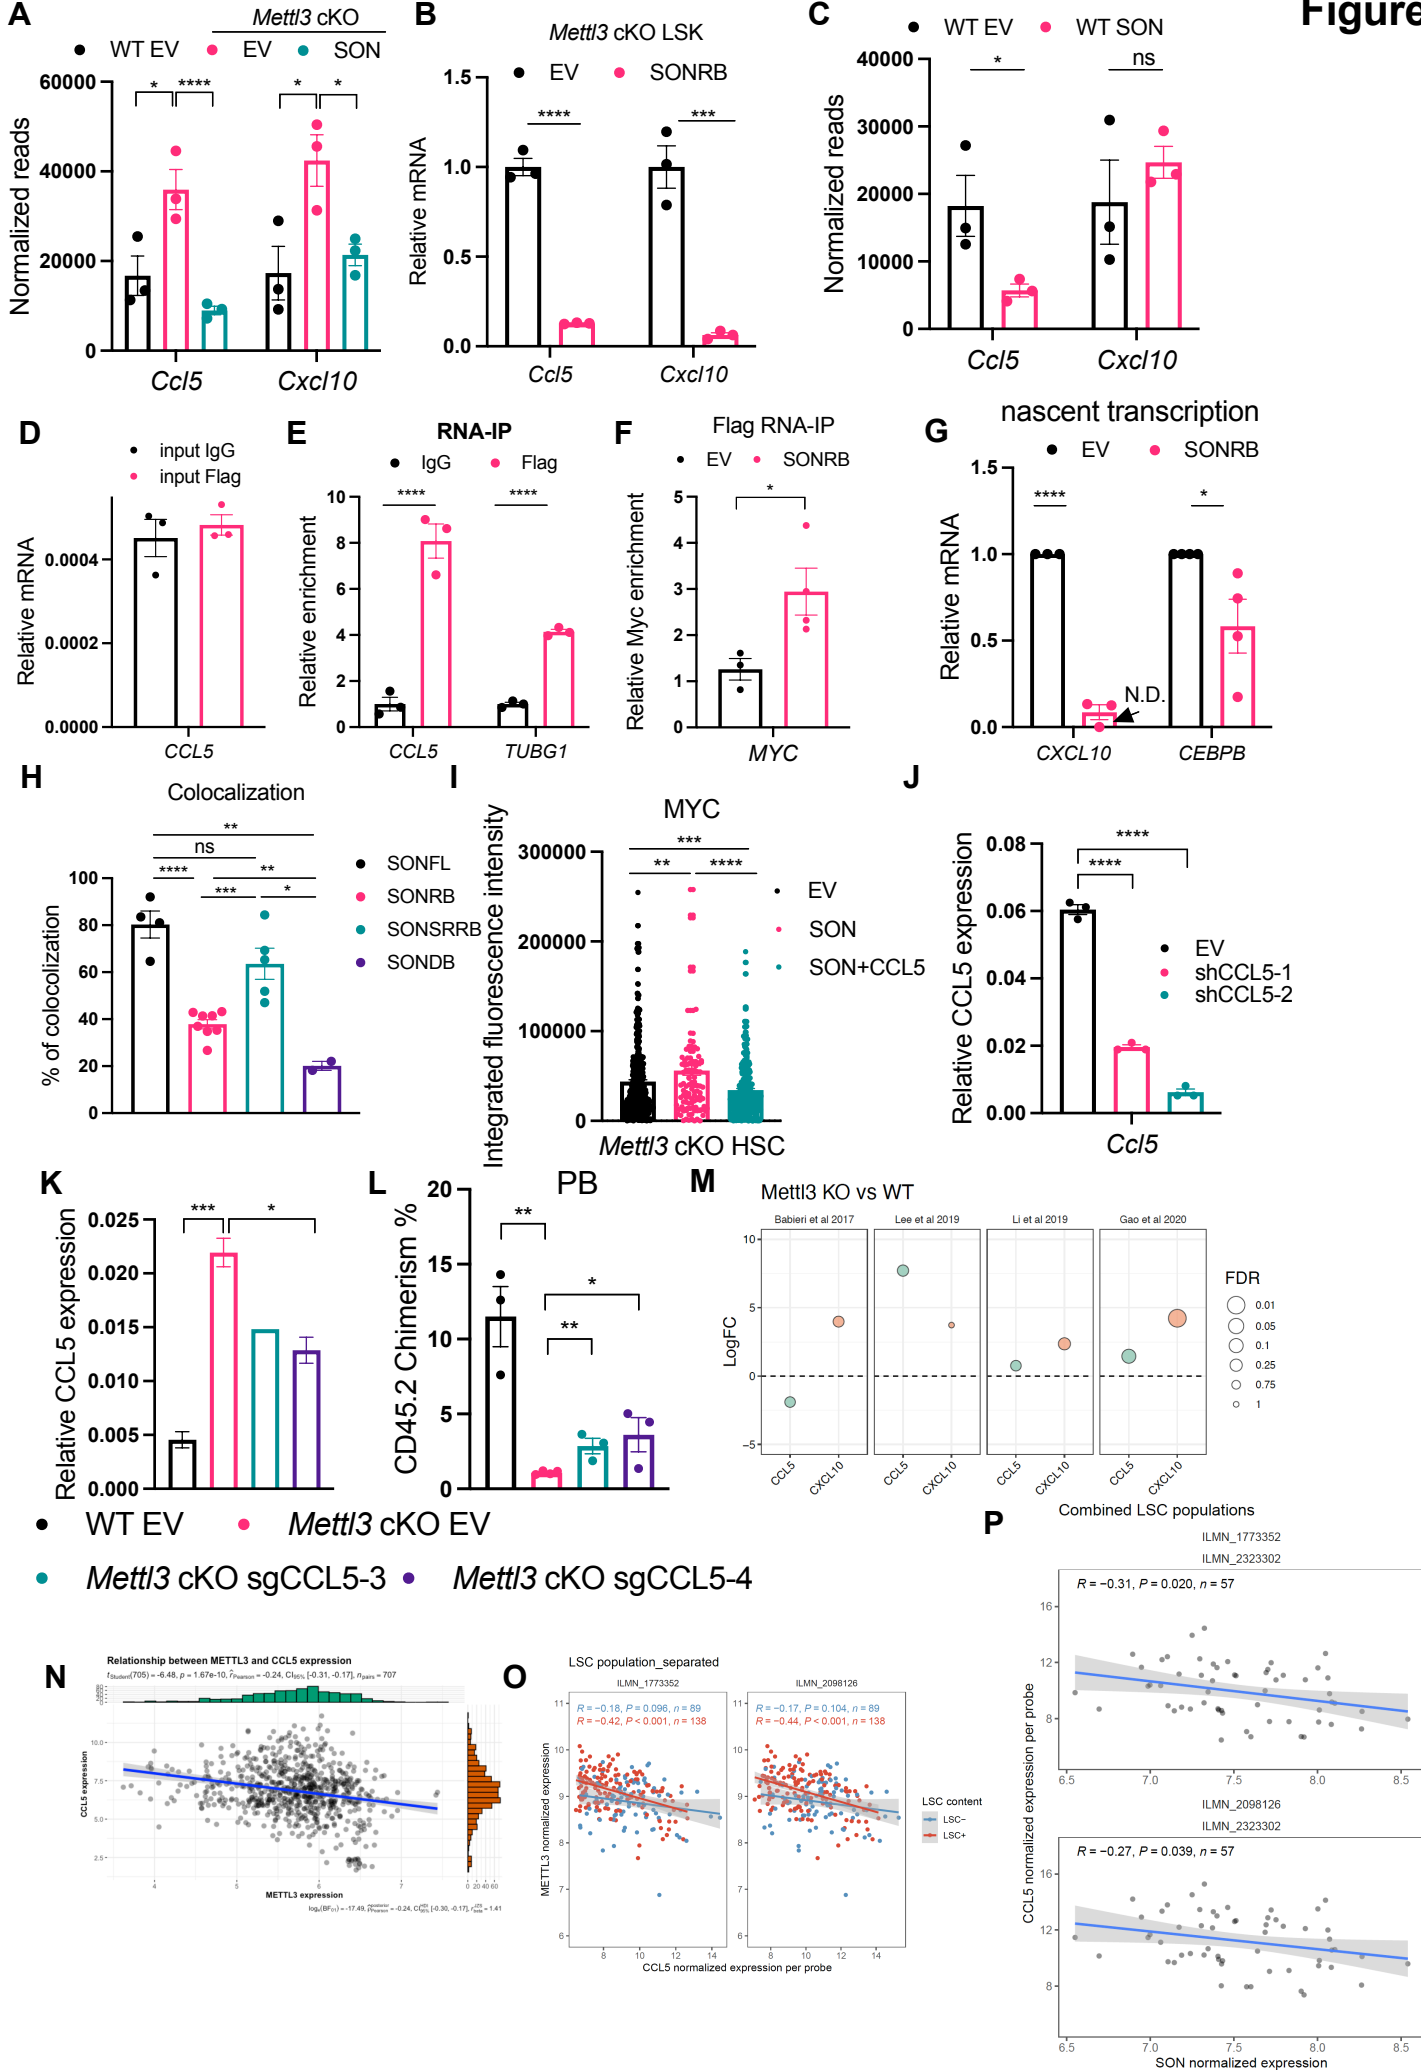

Supplementary Figure 6: CCL5 is a downstream of SON that controls HSC symmetric commitment fate. Related to Figure 6.

- (A) Both *Ccl5* and *Cxcl10* transcripts were rescued by SON overexpression in *Mettl3* cKO LSKs. Normalized RNA-seq read counts of *Ccl5* and *Cxcl10* transcripts in WT EV LSK, *Mettl3* cKO EV and *Mettl3* cKO SON overexpressing LSKs. n=3 independent assays.
- (B) SON-RB reduces *Ccl5* and *Cxcl10* expression in *Mettl3* cKO LSKs. Quantifications of *Ccl5* and *Cxcl10* expression in *Mettl3* cKO LSKs with EV, SON-RB overexpression using qPCR. n=3 independent assays.
- (C) *Ccl5*, but not *Cxcl10*, was downregulated by SON overexpression in WT LSKs. Normalized RNA-seq read counts of *Ccl5* and *Cxcl10* transcripts in WT EV LSK and WT SON overexpressing LSKs. n=3 independent assays.
- (D) CCL5 expression levels remain comparable in SON-RB overexpressing THP1 cells input samples used for IgG or Flag RNA IP.
- (E) SON-RB binds to the CCL5 transcript in THP1 cells. RNA-IP in THP1 cells expressing SON-RB-Flag retrovirus using mouse IgG antibody or Flag antibody followed by RNA extraction and qPCR of target genes. n=3, n represents independent experiments.
- (F) SON-RB binds to MYC transcript in THP1 cells. RNA-IP in THP1 cells expressing empty vector (MIG) or SON-RB-Flag retrovirus followed by qPCR targeting MYC transcript. n=3 independent assays.
- (G) SON-RB suppresses nascent transcription of the CXCL10 and CEBPB transcripts in THP1 cells. n=3 independent experiments.
- (H) SON-RB colocalizes to endogenous nuclear speckles. 293T cells were transfected with Flag tagged fragments include SON-FL (full length), SON-RB, SON SR+RB, or SON DB. Colocalization of Flag and endogenous SON were measured based on confocal images using Fiji.
- (I) Upregulation of MYC abundance were blocked with CCL5 treatment in *Mettl3* cKO LSK with SON overexpression. Quantifications of MYC protein abundance in *Mettl3* cKO LSKs with EV, SON overexpression with or without CCL5 treatment using immunofluorescence.
- (J) Knockdown of *Ccl5* mRNA levels using shRNAs against *Ccl5* in the *Mettl3* cKO LSK cells measured by qPCR. n=3 independent assays.
- (K) Knockdown of *Ccl5* mRNA levels using sgRNAs against *Ccl5* in the *RosaCAS9 Mettl3* cKO LSK cells measured by qPCR. n=3 independent assays.
- (L) Depletion of CCL5 in *Mettl3* cKO LSKs using sgRNAs improves engraftment capacity. Quantification of the frequency of donor-derived cells was shown in the peripheral blood 4 weeks post transplantation. n=3-4, n represents number of mice. Data in (A-L) represent means  $\pm$  s.e.m. , \* represents  $p < 0.05$ . \*\* represents  $p < 0.01$ . \*\*\* represents  $p < 0.001$ . \*\*\*\* represents  $p < 0.0001$ . ns represents  $p > 0.05$ .
- (M) Reported Log fold changes in expression of CCL5 and CXCL10 genes across *Mettl3* cKO or METTL3 KO versus WT RNA-seq datasets in mouse and human. False discovery rate values are indicated with the corresponding circle size, with more significant values having a bigger area.
- (N) Scatter plot showing a negative correlation between METTL3 and CCL5 expression in BEAT-AML patient datasets (n = 707).
- (O) The negative correlation of METTL3 and CCL5 expression is more significant in leukemia stem cell positive patients compared to the leukemia stem cell negative patient samples (138 LSC+ and 89 LSC-) of an AML cohort GSE76009 (n = 78). CCL5 is measured by two probes, consequently the associated expression is separated by probe.
- (P) Negative correlation between SON and CCL5 in METTL3 low expressing patients (the 25% lowest percentile) in the same dataset as (N). In both top and bottom panels, x axis represents SON normalized expression, and y axis represents CCL5 normalized expression for two different probes detecting CCL5 (top ILMN\_1773352; bottom ILMN\_2098126).
